# Supplementary material for: LC-MS/MS suggests that hole hopping in cytochrome c peroxidase protects its heme from oxidative modification by excess H 2 O 2
Source: Royal Society of Chemistry journal article supplement (doi:10.1039/c6sc03125k), 2016-09-07
Supplement: c6sc03125k1.pdf [file c6sc03125k1.pdf]

## SUPPLEMENTAL INFORMATION

### LC-MS/MS suggests that hole hopping in cytochrome c peroxidase protects its heme from oxidative modification by excess H<sub>2</sub>O<sub>2</sub>

Meena Kathiresan and Ann M. English\*

#### Contents

|                                                                                                                                                                       |    |
|-----------------------------------------------------------------------------------------------------------------------------------------------------------------------|----|
| Fig. S1: Tryptic peptides T1-T34 predicted for Ccp1.....                                                                                                              | 2  |
| LC-MS and LC-MS/MS analyses .....                                                                                                                                     | 3  |
| Table S1: Oxidative modifications considered in database searching.....                                                                                               | 4  |
| Table S2: Peak areas (PAs) of the internal reference peptides in the Ccp1 tryptic digests.....                                                                        | 5  |
| Table S3: Monoisotopic <i>m/z</i> values of the MH <sup>+</sup> ions of tryptic peptides observed in the digests of H <sub>2</sub> O <sub>2</sub> -oxidized Ccp1..... | 6  |
| Table S4: CCP activity of H <sub>2</sub> O <sub>2</sub> -oxidized Ccp1 .....                                                                                          | 8  |
| Table S5. Peptides T21 (M172, H175) and T14+T15 (W126, C128) are oxidized at two residues.....                                                                        | 9  |
| Table S6: Assignment of sequence ions in the MS/MS spectrum of the T6 native peptide.....                                                                             | 10 |
| Table S7: Assignment of sequence ions in the MS/MS spectrum of the T6 oxidized peptide .....                                                                          | 11 |
| Fig. S2: Characterization of <i>intramolecular</i> dityrosine crosslinks in H <sub>2</sub> O <sub>2</sub> -oxidized Ccp1 .....                                        | 12 |
| Fig. S3. LC-MS/MS analysis of dityrosine formation in tryptic peptides T8 and T26 .....                                                                               | 13 |
| Fig. S4: LC-MS analysis of heme released from Ccp1 exposed to 0, 10 and 100 M eq of H <sub>2</sub> O <sub>2</sub> .....                                               | 14 |
| Fig. S5: LC-MS/MS analysis of H175 and H52 oxidation in tryptic peptides T21 and T7 .....                                                                             | 15 |
| Standard MD simulations of Ccp1 in water with O <sub>2</sub> molecules.....                                                                                           | 16 |
| Fig. S6: MD simulation of Ccp1 in water with 100 added O <sub>2</sub> molecules.....                                                                                  | 17 |
| Fig. S7: Ultraviolet circular dichroism spectrum of Ccp1 oxidized with 0, 1 and 10 M eq of H <sub>2</sub> O <sub>2</sub> .....                                        | 18 |
| Table S8: O <sub>2</sub> and water exposure of the oxidizable residues in Ccp1.....                                                                                   | 19 |
| Scheme S1: Proposed pathway of tryptophan oxidation .....                                                                                                             | 20 |
| Scheme S2: Proposed pathway of tyrosine oxidation .....                                                                                                               | 20 |
| Scheme S3: Proposed pathway of histidine oxidation .....                                                                                                              | 21 |
| Scheme S4: Proposed pathway of cysteine oxidation.....                                                                                                                | 21 |
| Scheme S5: Proposed pathway of methionine oxidation.....                                                                                                              | 22 |
| Supplemental literature cited.....                                                                                                                                    | 22 |

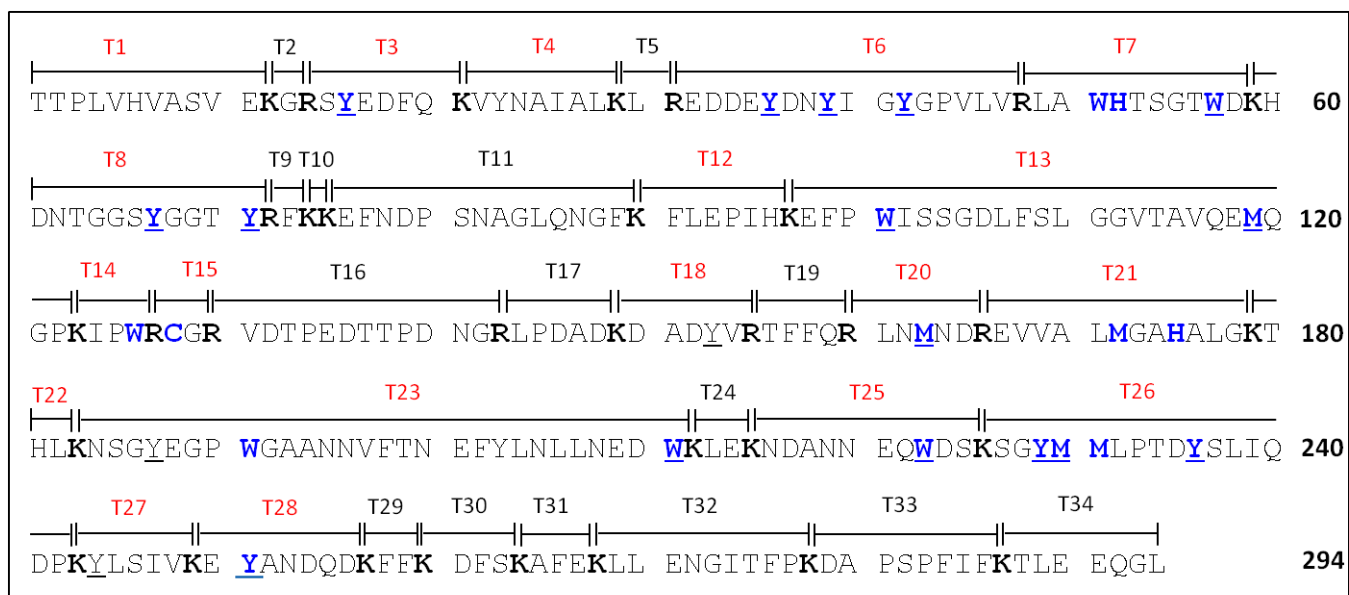

**Fig. S1: Tryptic peptides T1-T34 predicted for Ccp1**

The protein's sequence is divided in blocks of 10 residues and the trypsin cleavage sites arginine (R) and lysine (K) residues are bolded. Peptides that contain oxidizable residues (M, C, Y, W, H) are labeled in red font and the 24 residues found to be > 5% oxidized are in blue font. Solvent-exposed oxidizable residues are underlined.

## LC-MS and LC-MS/MS analyses

**LC-MS analysis of intact apo- and holoCcp1 ± H<sub>2</sub>O<sub>2</sub> and of Ccp1-derived heme.** Solutions of oxidized apo- and holoCcp1 were diluted into 5% aqueous acetonitrile/0.1% formic acid (MS solvent) and 2 µL aliquots were loaded onto a reversed-phase Zorbax 300SB-CN (2.1 x 150 mm, 5 µm) column attached to an Agilent 1200 HPLC and equilibrated with the MS solvent at room temperature. Samples were eluted from the HPLC column at a flow rate of 0.2 mL/min with a 5-95% acetonitrile gradient over 5 min into the Z-Spray source of a QToF3 mass spectrometer (Waters). The acetonitrile concentration was held constant at 95% for 3 min, lowered to 5% over the next 3 min and the column was re-equilibrated with the MS solvent for 8 min prior to the next injection. Mass measurements were performed using the following QToF3 parameters: capillary voltage 3.5 kV, cone voltage 35 V, RF lens 50 V, source temperature 80°C and desolvation temperature 300 °C. Protein envelopes were deconvolved (MaxEnt1 algorithm, Waters) to give intact protein masses.

To monitor its integrity, the exact mass of the heme released at low pH from oxidized Ccp1 was recorded. The oxidized protein in the MS solvent was injected onto a reversed-phase C4 capillary column (100 µm x 4.0 cm) prepared in-house and attached to a NanoLC (EASY-nLC, Thermo Scientific). The column was equilibrated with the same solvent and samples were eluted at 200 nL/min with a 5-95% acetonitrile gradient into the nanoESI source of a LTQ Orbitrap Velos mass spectrometer (Thermo Scientific) and analyzed in full-scan mode (*m/z* 100–2000) in the Orbitrap high resolution mass analyzer (*R*=60,000 at *m/z* 400). Other instrument parameters were: electrospray voltage 3 kV, CID collision energy 35 V and heated capillary temperature 200 °C.

**LC-MS/MS analysis of tryptic digests of oxidized Ccp1.** Donor residues were identified by sequencing of the oxidized tryptic peptides. Untreated Ccp1 and oxidized Ccp1 were alkylated with 55 mM iodoacetamide for 30 min at room temperature and digested overnight with 12.5 ng/µL (1:20) of trypsin in 50 mM ammonium bicarbonate (pH 8.0)/100 µM DTPA at 37 °C. The digests were desalted on C18 Zip Tips and the tryptic peptides (5 µL/injection) were separated on a homemade reversed-phase C18 capillary column (100 µm x 6.5 cm) equilibrated with 2% aqueous acetonitrile/0.1% formic acid and attached to the NanoLC. Peptides were eluted at a flow rate of 200 nL/min into the nanoESI source of the Orbitrap mass spectrometer using a 2-94% acetonitrile gradient and analyzed in the Orbitrap as described for heme above. Sequence coverage from the peptide maps was routinely 96-100%, and included all the oxidizable residues shown in Fig. 1.

Precursor peptide ions were selected in MS1 using a mass exclusion threshold of 10 ppm and fragmented in the Velos linear ion trap at a collision energy of 35 V. MS2 fragments with an intensity count of ≥20 were analyzed with a mass tolerance of 0.8 u using Proteome Discoverer 1.3.0 software (Thermo Scientific) and the Sequest search engine with mass filters for the oxidative modifications listed in Table S1 in addition to cysteine alkylation by iodoacetamide (+ 57 u). Dynamic exclusion was enabled with a repeat count of 1, a repeat duration of 30 s and an excluded list size of 500. Sequest correlates the MS2 spectra with peptide sequences in the Ccp1 Fasta file downloaded from the NCBI website (<ftp://ftp.ncbi.nlm.nih.gov/>). Sequest's filters, XCorr (>2) and False Discovery Rate (<0.01), were implemented for confident peptide identification.

**Table S1: Oxidative modifications considered in database searching <sup>a</sup>**

| <b>Modification: candidate amino acids <sup>b</sup></b>     | <b><math>\Delta m</math> (u) <sup>c</sup></b> |
|-------------------------------------------------------------|-----------------------------------------------|
| Monoxidation (ox): K, R, C, M, Y, H, P, W, F, D, N          | 15.9949                                       |
| Dioxidation (diox): K, R, C, M, Y, H, P, W, F               | 31.9898                                       |
| Trioxidation (triox): C                                     | 47.9847                                       |
| Carbonylation: R, E, Q, I, L, K, V, W                       | 13.9793                                       |
| Hydroxykynurenine: W                                        | 19.9898                                       |
| Kynurenine (kyn): W                                         | 3.9949                                        |
| Pyrrolidinone: P                                            | 30.0105                                       |
| Pyroglutamic acid: P                                        | 13.9792                                       |
| Asparagine: H                                               | 23.0159                                       |
| Aspartic acid: H                                            | 22.0319                                       |
| Aspartylurea: H                                             | 10.0320                                       |
| Formylasparagine: H                                         | 4.9790                                        |
| Aspartate semialdehyde: M                                   | 32.0085                                       |
| Homocysteic acid: M                                         | 33.9691                                       |
| Dehydro (deH): K, R, C, M, Y, H, P, W, F, D, N <sup>d</sup> | 1.00783                                       |

<sup>a</sup> Mass filters for these oxidative modifications were used with the Sequest search engine

<sup>b</sup> Reported products of single amino acid oxidation.<sup>1,2</sup>

<sup>c</sup> Difference in the monoisotopic mass of the oxidized and native form of the indicated amino acid.

<sup>d</sup> Crosslinked residues undergo loss of a hydrogen atom (see main text).

**Table S2: Peak areas (PAs) of the internal reference peptides in the Ccp1 tryptic digests <sup>a</sup>**

| Peptide sequence                                | Obs MH <sup>+</sup><br>( <i>m/z</i> ) | ppm<br>error <sup>b</sup> | PA <sup>c</sup>                                |                                                |                                                |                                                 |
|-------------------------------------------------|---------------------------------------|---------------------------|------------------------------------------------|------------------------------------------------|------------------------------------------------|-------------------------------------------------|
|                                                 |                                       |                           | 0:1<br>[H <sub>2</sub> O <sub>2</sub> ]:[Ccp1] | 1:1<br>[H <sub>2</sub> O <sub>2</sub> ]:[Ccp1] | 5:1<br>[H <sub>2</sub> O <sub>2</sub> ]:[Ccp1] | 10:1<br>[H <sub>2</sub> O <sub>2</sub> ]:[Ccp1] |
| T4 VYNAIALK                                     | 891.5296                              | 0.22                      | 1.59E10 ±<br>7.12E8 <b>(4.5)</b>               | 1.50E10 ±<br>1.77E8 <b>(1.0)</b>               | 1.56E10 ±<br>8.57E08 <b>(5.5)</b>              | 1.66E10 ±<br>7.28E8 <b>(4.4)</b>                |
| T19 TFFQR                                       | 698.3626                              | 0.86                      | 1.76E9 ±<br>7.80E7 <b>(4.4)</b>                | 1.78E9 ±<br>6.87E7 <b>(3.8)</b>                | 1.69E9 ±<br>8.50E7 <b>(5.0)</b>                | 1.76E9 ±<br>8.50E7 <b>(4.8)</b>                 |
| T27 YLSIVK                                      | 722.4450                              | 0.41                      | 1.30E9 ±<br>2.55E7 <b>(2.0)</b>                | 1.37E9 ±<br>4.51E7 <b>(3.3)</b>                | 1.32E9 ±<br>2.56E7 <b>(1.9)</b>                | 1.35E9 ±<br>7.20E7 <b>(5.3)</b>                 |
| T34 TLEEQGL                                     | 789.3993                              | 0.50                      | 1.59E9 ±<br>7.03E7 <b>(4.4)</b>                | 1.68E9 ±<br>9.67E7 <b>(5.7)</b>                | 1.66E9 ±<br>3.75E7 <b>(2.2)</b>                | 1.72E9 ±<br>6.79E7 <b>(3.9)</b>                 |
| Average PA of T4, T19,<br>T27, T34 <sup>d</sup> |                                       |                           | <b>5.1E9</b>                                   | <b>5.0E9</b>                                   | <b>5.1E9</b>                                   | <b>5.4E9</b>                                    |

<sup>a</sup> No oxidative modifications were detected in these tryptic peptides, which are used as internal reference peptides.<sup>3</sup>

<sup>b</sup> The error in the observed monoisotopic *m/z* value in ppm is given by 10<sup>6</sup>(Obs *m/z* – Calc *m/z*)/Calc *m/z*.

<sup>c</sup> The intensity of each peptide ion corresponds to its PA in the extracted ion chromatogram (XIC) within a 10 ppm exclusion window. Each PA is the average ± SD of four independent experiments (*n*=4) and the relative standard deviation (% RSD) is given in **red font**.

<sup>d</sup> The average PA at each H<sub>2</sub>O<sub>2</sub>:Ccp1 molar ratio is used as a normalization factor in Eq. 6 of the main text to correct for variation in instrument response and/or ion suppression.<sup>3</sup>

**Table S3: Monoisotopic  $m/z$  values of the  $MH^+$  ions of tryptic peptides observed in the digests of  $H_2O_2$ -oxidized Ccp1**

| Tryptic peptide <sup>a</sup> | Residues <sup>a</sup> | Residue(s) oxidized <sup>b</sup>                                                                        | Obs $MH^+$ ( $m/z$ )                                          | Calc $MH^+$ ( $m/z$ )                                         | ppm error <sup>c</sup>                |
|------------------------------|-----------------------|---------------------------------------------------------------------------------------------------------|---------------------------------------------------------------|---------------------------------------------------------------|---------------------------------------|
| T2+T3                        | 13-21                 | None<br>Y16 (ox)                                                                                        | 1129.5289<br>1145.5228                                        | 1129.5273<br>1145.5222                                        | 1.42<br>0.52                          |
| T3                           | 15-21                 | None<br>Y16 (ox)                                                                                        | 916.4078<br>932.4005                                          | 916.4047<br>932.3996                                          | 3.38<br>0.97                          |
| T4                           | 22-29                 | None<br>Y23 (ox)                                                                                        | 891.5310<br>907.5249                                          | 891.5298<br>907.5247                                          | 1.35<br>0.22                          |
| T5+T6                        | 30-48                 | None<br>Y42 (ox)<br>Y39 (ox); Y42 (ox)<br>Y36 (deH); Y39 (deH)<br>Y39 (deH); Y42 (deH)                  | 2286.1147<br>2302.1053<br>2318.0937<br>2284.0925<br>2284.0969 | 2286.1037<br>2302.0986<br>2318.0935<br>2284.0881<br>2284.0881 | 4.81<br>2.91<br>0.09<br>1.93<br>3.85  |
| T6                           | 32-48                 | None<br>Y36 (ox)<br>Y39 (ox)<br>Y42 (ox)<br>Y36 (deH); Y39 (deH)                                        | 2016.9206<br>2032.9174<br>2032.9200<br>2032.9172<br>2014.8979 | 2016.9185<br>2032.9134<br>2032.9134<br>2032.9134<br>2014.9029 | 1.04<br>1.97<br>3.25<br>1.87<br>-2.46 |
| T7                           | 49-59                 | None<br>W57 (diox)<br>W51 (diox); H52(ox)<br>W51 (diox); W57 (diox)<br>W51 (diox); W57 (diox); H52 (ox) | 1301.6290<br>1333.6188<br>1349.6158<br>1365.6086<br>1384.6035 | 1301.6273<br>1333.6171<br>1349.6121<br>1365.6069<br>1384.6018 | 1.31<br>1.27<br>2.74<br>1.24<br>1.23  |
| T8                           | 60-72                 | None<br>Y71 (ox)<br>Y67 (ox); Y71 (ox)<br>Y67 (deH); Y71 (deH)                                          | 1384.5857<br>1400.5811<br>1416.5842<br>1382.5776              | 1384.5876<br>1400.5825<br>1416.5775<br>1382.5720              | -1.37<br>-1.00<br>4.73<br>4.05        |
| T13                          | 98-123                | None<br>M119 (ox)<br>W101 (ox)<br>W101 (ox); M119 (ox)<br>W101 (diox); M119 (ox)                        | 2780.3697<br>2796.3589<br>2796.3635<br>2812.3628<br>2828.3554 | 2780.3600<br>2796.3549<br>2796.3549<br>2812.3498<br>2828.3447 | 3.49<br>1.43<br>3.08<br>4.62<br>3.78  |
| T14                          | 124-127               | None<br>W126 (ox)                                                                                       | 571.3361<br>587.3308                                          | 571.3351<br>587.3300                                          | 1.75<br>1.36                          |
| T14+T15                      | 124-130               | None<br>W126 (ox); C128 (diox)<br>W126 (ox); C128 (triox)<br>W126 (diox); C128 (triox)                  | 887.4668<br>935.4524<br>951.4455<br>967.4446                  | 887.4669<br>935.4516<br>951.4465<br>967.4414                  | -0.11<br>0.86<br>-1.05<br>3.31        |
| T16+T17+T18                  | 131-155               | None                                                                                                    | 2775.2782                                                     | 2775.2704                                                     | 2.81                                  |
| T17+T18                      | 144-155               | None                                                                                                    | 1377.6588                                                     | 1377.6645                                                     | -4.14                                 |
| T20                          | 161-166               | None<br>M163 (ox)                                                                                       | 762.3591<br>778.3529                                          | 762.3563<br>778.3512                                          | 3.67<br>2.18                          |
| T20+T21                      | 161-179               | None<br>M163 (ox)<br>M172 (ox); H175 (ox)                                                               | 2039.0542<br>2055.0475<br>2071.0429                           | 2039.0525<br>2055.0474<br>2071.0423                           | 0.83<br>0.05<br>0.29                  |
| T21                          | 167-179               | None<br>M172 (ox)<br>H175 (ox)                                                                          | 1295.7149<br>1311.7099<br>1311.7060                           | 1295.7140<br>1311.7089<br>1311.7089                           | 0.69<br>0.76<br>-2.21                 |

|             |         |                                                                                                                                  |                                                                            |                                                                            |                                              |
|-------------|---------|----------------------------------------------------------------------------------------------------------------------------------|----------------------------------------------------------------------------|----------------------------------------------------------------------------|----------------------------------------------|
|             |         | M172 (ox); H175 (ox)                                                                                                             | 1327.7065                                                                  | 1327.7038                                                                  | 2.03                                         |
| T23         | 184-212 | None<br>W191 (ox)<br>W211 (ox)<br>W191 (ox); W211 (diox)                                                                         | 3362.5536<br>3378.5398<br>3378.5353<br>3410.5275                           | 3362.5389<br>3378.5338<br>3378.5338<br>3410.5236                           | 4.37<br>1.78<br>0.44<br>1.14                 |
| T23+T24     | 184-215 | None<br>W211 (ox)<br>W191 (ox); W211 (diox)<br>W191 (diox); W211 (diox)                                                          | 3732.7527<br>3748.7640<br>3780.7540<br>3796.7544                           | 3732.7605<br>3748.7554<br>3780.7453<br>3796.7401                           | -2.09<br>2.30<br>2.30<br>3.77                |
| T24+T25     | 213-226 | None<br>W223 (ox)<br>W223 (diox)<br>W223 (kyn)                                                                                   | 1690.7642<br>1706.7592<br>1722.7558<br>1694.7630                           | 1690.7667<br>1706.7616<br>1722.7565<br>1694.7616                           | -1.48<br>-1.41<br>-0.41<br>0.83              |
| T25         | 216-226 | None<br>W223 (ox)<br>W223 (diox)                                                                                                 | 1320.5460<br>1336.5402<br>1352.5354                                        | 1320.5451<br>1336.5400<br>1352.5349                                        | 0.68<br>0.15<br>0.37                         |
| T25+T26     | 216-243 | None<br>W223 (ox)<br>Y229 (deH); Y236 (deH)<br>Y229 (deH); Y236 (deH); M230 (ox)<br>W223 (ox); M230 (ox); M231 (ox)              | 3260.4611<br>3276.4603<br>3258.4475<br>3274.4412<br>3308.4425              | 3260.4511<br>3276.4460<br>3258.4355<br>3274.4304<br>3308.4358              | 3.07<br>4.36<br>3.68<br>3.30<br>2.03         |
| T26         | 227-243 | None<br>Y229 (ox)<br>M230 (ox); M231 (ox)<br>Y229 (ox); M230 (ox)<br>Y229 (deH); Y236 (deH)<br>Y229 (deH); Y236 (deH); M230 (ox) | 1958.9296<br>1974.9265<br>1990.9207<br>1990.9192<br>1956.9138<br>1972.9081 | 1958.9238<br>1974.9187<br>1990.9136<br>1990.9136<br>1956.9074<br>1972.9031 | 2.96<br>3.95<br>3.57<br>2.81<br>3.27<br>2.53 |
| T27         | 244-249 | None<br>Y244 (ox)<br>Y244 (diox)                                                                                                 | 722.4450<br>738.4380<br>754.4352                                           | 722.4447<br>738.4396<br>754.4345                                           | 0.42<br>-2.17<br>0.93                        |
| T28         | 250-257 | None<br>Y251 (ox)                                                                                                                | 982.4110<br>998.4077                                                       | 982.4112<br>998.4061                                                       | -0.20<br>1.60                                |
| T28+T29     | 250-260 | None<br>Y251 (ox)                                                                                                                | 1404.6479<br>1420.6410                                                     | 1404.6430<br>1420.6379                                                     | 3.49<br>2.18                                 |
| T28+T29+T30 | 250-264 | None<br>Y251 (ox)<br>Y251 (diox)                                                                                                 | 1881.8700<br>1897.8605<br>1913.8564                                        | 1881.8654<br>1897.8603<br>1913.8552                                        | 2.44<br>0.11<br>0.63                         |

<sup>a</sup> Fig. S1 gives the tryptic map of Ccp1 and the sequence of tryptic peptides T1-T34.

<sup>b</sup> Observed residue modifications are assigned based on the  $\Delta m$  values in Table S1.

<sup>c</sup> See definition of ppm error in Footnote b of Table S2.

**Table S4: CCP activity of H<sub>2</sub>O<sub>2</sub>-oxidized Ccp1<sup>a</sup>**

| [H <sub>2</sub> O <sub>2</sub> ]:[Ccp1] <sup>b</sup> | CCP activity <sup>a</sup> | Percent activity <sup>c</sup> |
|------------------------------------------------------|---------------------------|-------------------------------|
| 0:1                                                  | 1.70 ± 0.010              | 100 ± 0.00                    |
| 0.5:1                                                | 1.59 ± 0.021              | 93.5 ± 0.93                   |
| 1:1                                                  | 1.34 ± 0.045              | 78.8 ± 2.37                   |
| 3:1                                                  | 0.92 ± 0.028              | 54.1 ± 2.16                   |
| 5:1                                                  | 0.66 ± 0.036              | 38.8 ± 3.88                   |
| 10:1                                                 | 0.18 ± 0.008              | 10.6 ± 3.30                   |

<sup>a</sup> One unit of CCP activity catalyzes the oxidation by H<sub>2</sub>O<sub>2</sub> of 1 μmol of horse heart ferrocycytochrome c (Cyc<sup>II</sup>) per min per mg Ccp1.

<sup>b</sup> Stock Ccp1 (5 μM) and H<sub>2</sub>O<sub>2</sub> solutions (0.01–1 mM) were prepared in Kpi/DTPA, and mixed to give 1 μM Ccp1 with the desired H<sub>2</sub>O<sub>2</sub> concentrations. Samples were incubated at room temperature for 1 h and activities were measured as described previously.<sup>4</sup> For the assay, a stock solution of Cyc<sup>III</sup> was ~90% reduced with sodium dithionite and the Cyc<sup>II</sup> concentration determined spectrophotometrically ( $\epsilon_{550} = 27.6 \text{ mM}^{-1} \text{ cm}^{-1}$ ).<sup>5</sup>

<sup>c</sup> The activity of each fraction was ratioed by the activity of the 0:1 sample to give percent activity. Results are presented as averages ± SD from three independent experiments ( $n=3$ ).



**Table S5. Peptides T21 (M172, H175) and T14+T15 (W126, C128) are oxidized at two residues <sup>a</sup>**

| Tryptic peptide | Residue(s) oxidized ( $X_{ox}$ ) | Obs MH <sup>+</sup> ( $m/z$ ) <sup>b</sup> | Calc MH <sup>+</sup> ( $m/z$ ) <sup>c</sup> | ppm error <sup>c</sup> | % $X_{ox}$ <sup>d</sup>             |             |            |            |
|-----------------|----------------------------------|--------------------------------------------|---------------------------------------------|------------------------|-------------------------------------|-------------|------------|------------|
|                 |                                  |                                            |                                             |                        | H <sub>2</sub> O <sub>2</sub> :Ccp1 |             |            |            |
|                 |                                  |                                            |                                             |                        | 0:1                                 | 1:1         | 5:1        | 10:1       |
| T21             | None                             | 1295.7149                                  | 1295.7140                                   | 0.70                   | 90.9 ± 0.1                          | 66.4 ± 10.2 | 17.5 ± 1.0 | 9.2 ± 1.4  |
| T21             | M172 +16                         | 1311.7108                                  | 1311.7089                                   | 1.44                   | 8.8 ± 11.1                          | 30.4 ± 2.9  | 47.2 ± 5.7 | 48.2 ± 3.1 |
| T21             | H175 +16                         | 1311.7050                                  | 1311.7089                                   | -2.97                  | ---                                 | 3.2 ± 2.5   | 28.5 ± 2.0 | 37.2 ± 3.2 |
| T21             | M172 +16, H175 +16               | 1327.7064                                  | 1327.7038                                   | 1.95                   | ---                                 | ---         | 6.8 ± 4.0  | 4.9 ± 0.5  |
| T14+T15         | None                             | 887.4668                                   | 887.4669                                    | -0.11                  | 100 ± 0.0                           | 96.8 ± 0.6  | 3.7 ± 2.6  | 1.9 ± 3.7  |
| T14+T15         | W126+16, C128 +32                | 935.4524                                   | 935.4516                                    | 0.85                   | ---                                 | ---         | 23.7 ± 5.3 | 45.0 ± 2.7 |
| T14+T15         | W126 +16, C128 +48               | 951.4455                                   | 951.4465                                    | -1.05                  | ---                                 | ---         | 33.6 ± 6.9 | 48.2 ± 1.4 |
| T14+T15         | W126 +32, C128 +48               | 967.4446                                   | 967.4414                                    | 3.30                   | ---                                 | ---         | 2.2 ± 0.7  | 5.2 ± 1.3  |

<sup>a</sup> Ccp1 (1 μM) was reacted with 1, 5 and 10 M eq of H<sub>2</sub>O<sub>2</sub> for 1 h at room temperature in KPi/DTPA prior to tryptic digestion and LC-MS/MS analysis as described on page 3 of the SI.

<sup>b</sup> The precursor ions selected for MS2 analysis were filtered using a mass exclusion threshold of 10 ppm.

<sup>c</sup> The monoisotopic  $m/z$  values for the peptide MH<sup>+</sup> ions were calculated using Protein Prospector (<http://prospector.ucsf.edu>), and the ppm errors were calculated as in Footnote b of Table S2.

<sup>d</sup> The percent oxidation of H175, M172, W126 and C128 was calculated using Eq. 6 of the main text.

**Table S6: Assignment of sequence ions in the MS/MS spectrum of the T6 native peptide <sup>a</sup>**

| #1 <sup>c</sup> | b <sup>+</sup> | b <sup>2+</sup> | b <sup>3+</sup> | Seq. <sup>b</sup> | y <sup>+</sup> | y <sup>2+</sup> | y <sup>3+</sup> | #2 <sup>c</sup> |
|-----------------|----------------|-----------------|-----------------|-------------------|----------------|-----------------|-----------------|-----------------|
| 1               | 130.04988      | 65.52858        | 44.02148        | E                 |                |                 |                 | 17              |
| 2               | 245.07683      | 123.04205       | 82.36379        | D                 | 1887.87599     | 944.44163       | 629.96351       | 16              |
| 3               | 360.10378      | 180.55553       | 120.70611       | D                 | 1772.84904     | 886.92816       | 591.62120       | 15              |
| 4               | 489.14638      | 245.07683       | 163.72031       | E                 | 1657.82209     | 829.41468       | 553.27888       | 14              |
| 5               | 652.20970      | 326.60849       | 218.07475       | Y                 | 1528.77949     | 764.89338       | 510.26468       | 13              |
| 6               | 767.23665      | 384.12196       | 256.41707       | D                 | 1365.71617     | 683.36172       | 455.91024       | 12              |
| 7               | 881.27958      | 441.14343       | 294.43138       | N                 | 1250.68922     | 625.84825       | 417.56792       | 11              |
| 8               | 1044.34290     | 522.67509       | 348.78582       | Y                 | 1136.64629     | 568.82678       | 379.55361       | 10              |
| 9               | 1157.42697     | 579.21712       | 386.48051       | I                 | 973.58297      | 487.29512       | 325.19917       | 9               |
| 10              | 1214.44844     | 607.72786       | 405.48766       | G                 | 860.49890      | 430.75309       | 287.50448       | 8               |
| 11              | 1377.51176     | 689.25952       | 459.84210       | Y                 | 803.47743      | 402.24235       | 268.49733       | 7               |
| 12              | 1434.53323     | 717.77025       | 478.84926       | G                 | 640.41411      | 320.71069       | 214.14289       | 6               |
| 13              | 1531.58600     | 766.29664       | 511.20018       | P                 | 583.39264      | 292.19996       | 195.13573       | 5               |
| 14              | 1630.65442     | 815.83085       | 544.22299       | V                 | 486.33987      | 243.67357       | 162.78481       | 4               |
| 15              | 1743.73849     | 872.37288       | 581.91768       | L                 | 387.27145      | 194.13936       | 129.76200       | 3               |
| 16              | 1842.80691     | 921.90709       | 614.94049       | V                 | 274.18738      | 137.59733       | 92.06731        | 2               |
| 17              |                |                 |                 | R                 | 175.11896      | 88.06312        | 59.04450        | 1               |

<sup>a</sup> Observed  $b_n$  and  $y_n$  sequence ions in spectrum A of Fig. 6 of the main text.

<sup>b</sup> Sequence of T6 peptide - EDDEYDNYIGYGPVLVR

<sup>c</sup> Ions highlighted in **red** and **blue** font are  $b_n$  and  $y_n$  sequence ions, respectively, identified by MS/MS. Sequence ions in black are not identified by MS/MS. The sequence assignment is based on residue masses at 0.8 u mass tolerance (see page 3 of the SI for the experimental details).

**Table S7: Assignment of sequence ions in the MS/MS spectrum of the T6 oxidized peptide <sup>a</sup>**

| #1 <sup>c</sup> | b <sup>+</sup> | b <sup>2+</sup> | b <sup>3+</sup> | Seq. <sup>b</sup> | y <sup>+</sup> | y <sup>2+</sup> | y <sup>3+</sup> | #2 <sup>c</sup> |
|-----------------|----------------|-----------------|-----------------|-------------------|----------------|-----------------|-----------------|-----------------|
| 1               | 130.04988      | 65.52858        | 44.02148        | E                 |                |                 |                 | 17              |
| 2               | 245.07683      | 123.04205       | 82.36379        | D                 | 1885.86034     | 943.43381       | 629.29163       | 16              |
| 3               | 360.10378      | 180.55553       | 120.70611       | D                 | 1770.83339     | 885.92033       | 590.94931       | 15              |
| 4               | 489.14638      | 245.07683       | 163.72031       | E                 | 1655.80644     | 828.40686       | 552.60700       | 14              |
| 5               | 651.20187      | 326.10457       | 217.73881       | Y-<br>Dehydro     | 1526.76384     | 763.88556       | 509.59280       | 13              |
| 6               | 766.22882      | 383.61805       | 256.08112       | D                 | 1364.70835     | 682.85781       | 455.57430       | 12              |
| 7               | 880.27175      | 440.63951       | 294.09543       | N                 | 1249.68140     | 625.34434       | 417.23198       | 11              |
| 8               | 1042.32725     | 521.66726       | 348.11393       | Y-<br>Dehydro     | 1135.63847     | 568.32287       | 379.21767       | 10              |
| 9               | 1155.41132     | 578.20930       | 385.80862       | I                 | 973.58297      | 487.29512       | 325.19917       | 9               |
| 10              | 1212.43279     | 606.72003       | 404.81578       | G                 | 860.49890      | 430.75309       | 287.50448       | 8               |
| 11              | 1375.49611     | 688.25169       | 459.17022       | Y                 | 803.47743      | 402.24235       | 268.49733       | 7               |
| 12              | 1432.51758     | 716.76243       | 478.17738       | G                 | 640.41411      | 320.71069       | 214.14289       | 6               |
| 13              | 1529.57035     | 765.28881       | 510.52830       | P                 | 583.39264      | 292.19996       | 195.13573       | 5               |
| 14              | 1628.63877     | 814.82302       | 543.55111       | V                 | 486.33987      | 243.67357       | 162.78481       | 4               |
| 15              | 1741.72284     | 871.36506       | 581.24580       | L                 | 387.27145      | 194.13936       | 129.76200       | 3               |
| 16              | 1840.79126     | 920.89927       | 614.26860       | V                 | 274.18738      | 137.59733       | 92.06731        | 2               |
| 17              |                |                 |                 | R                 | 175.11896      | 88.06312        | 59.04450        | 1               |

<sup>a</sup> Observed  $b_n$  and  $y_n$  sequence ions in spectrum B of Fig. 6 of the main text.

<sup>b,c</sup> See Footnotes b and c to Table S6.

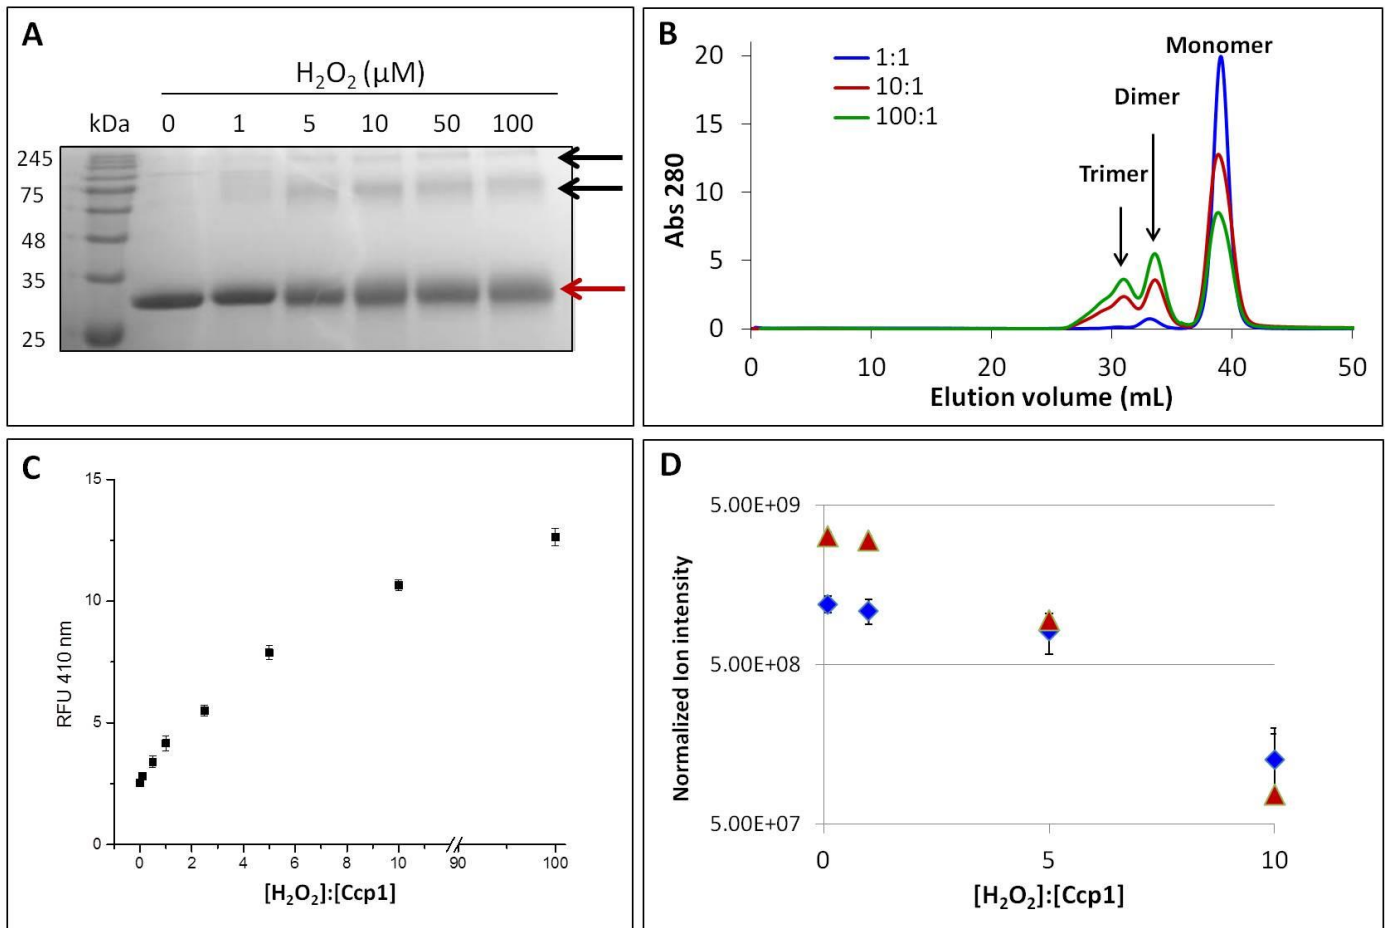

**Fig. S2: Characterization of intramolecular dityrosine crosslinks in H<sub>2</sub>O<sub>2</sub>-oxidized Ccp1**

**(A)** SDS-PAGE analysis of H<sub>2</sub>O<sub>2</sub>-oxidized Ccp1 under reducing conditions. Ccp1 (1 μM) was treated with the indicated H<sub>2</sub>O<sub>2</sub> concentration in KPi/DTPA for 1 h at room temperature and analyzed by 12% SDS-PAGE followed by Coomassie staining. The red arrow indicates that Ccp1 is predominantly monomeric (~35 kDa) but small quantities of the dimer and trimer (~70 and ~100 kDa) can be detected in the samples treated with 5-100 μM H<sub>2</sub>O<sub>2</sub>. The band containing monomeric Ccp1 becomes noticeably more diffuse with increasing H<sub>2</sub>O<sub>2</sub> added indicative of increased protein modification. **(B)** Gel-filtration chromatography of H<sub>2</sub>O<sub>2</sub>-oxidized Ccp1. Stock solutions in KPi/DTPA were mixed to give 10 μM Ccp1 with 10, 100 and 1000 μM H<sub>2</sub>O<sub>2</sub>, and incubated for 1 h at room temperature. Aliquots (100 μL) were applied to a 24-mL Superdex 200 HR 10/30 column (fractionation range 10-600 kDa) equilibrated with 20 mM KPi pH 7.5/150 mM NaCl and coupled to an ÄKTApurifier 10 (GE) with 280-nm detection. The protein was eluted in equilibration buffer at a flow rate of 0.5 mL/min and fractions containing monomeric Ccp1 were collected. Note that 10 μM Ccp1 was oxidized in order to obtain sufficient sample for the gel-filtration analysis but only 1 μM Ccp1 was oxidized for the MS analyses to attenuate *intermolecular* crosslinking as discussed in the Experimental section of the main text. **(C)** The monomeric Ccp1 samples were diluted to 1 μM in KPi/DTPA and on excitation at 315 nm, their emission at 410 nm was recorded in a Cary Eclipse fluorometer with 5-nm slits. Relative fluorescence units (RFU) are from three independent experiments ( $n=3$ ) and averages  $\pm$  SD are plotted. **(D)** Normalized ion intensity across three replicates for T6 (Y36, Y39, Y42; blue diamonds) and T8 (Y67, Y71; red triangles) plotted vs H<sub>2</sub>O<sub>2</sub>:Ccp1 molar ratio.

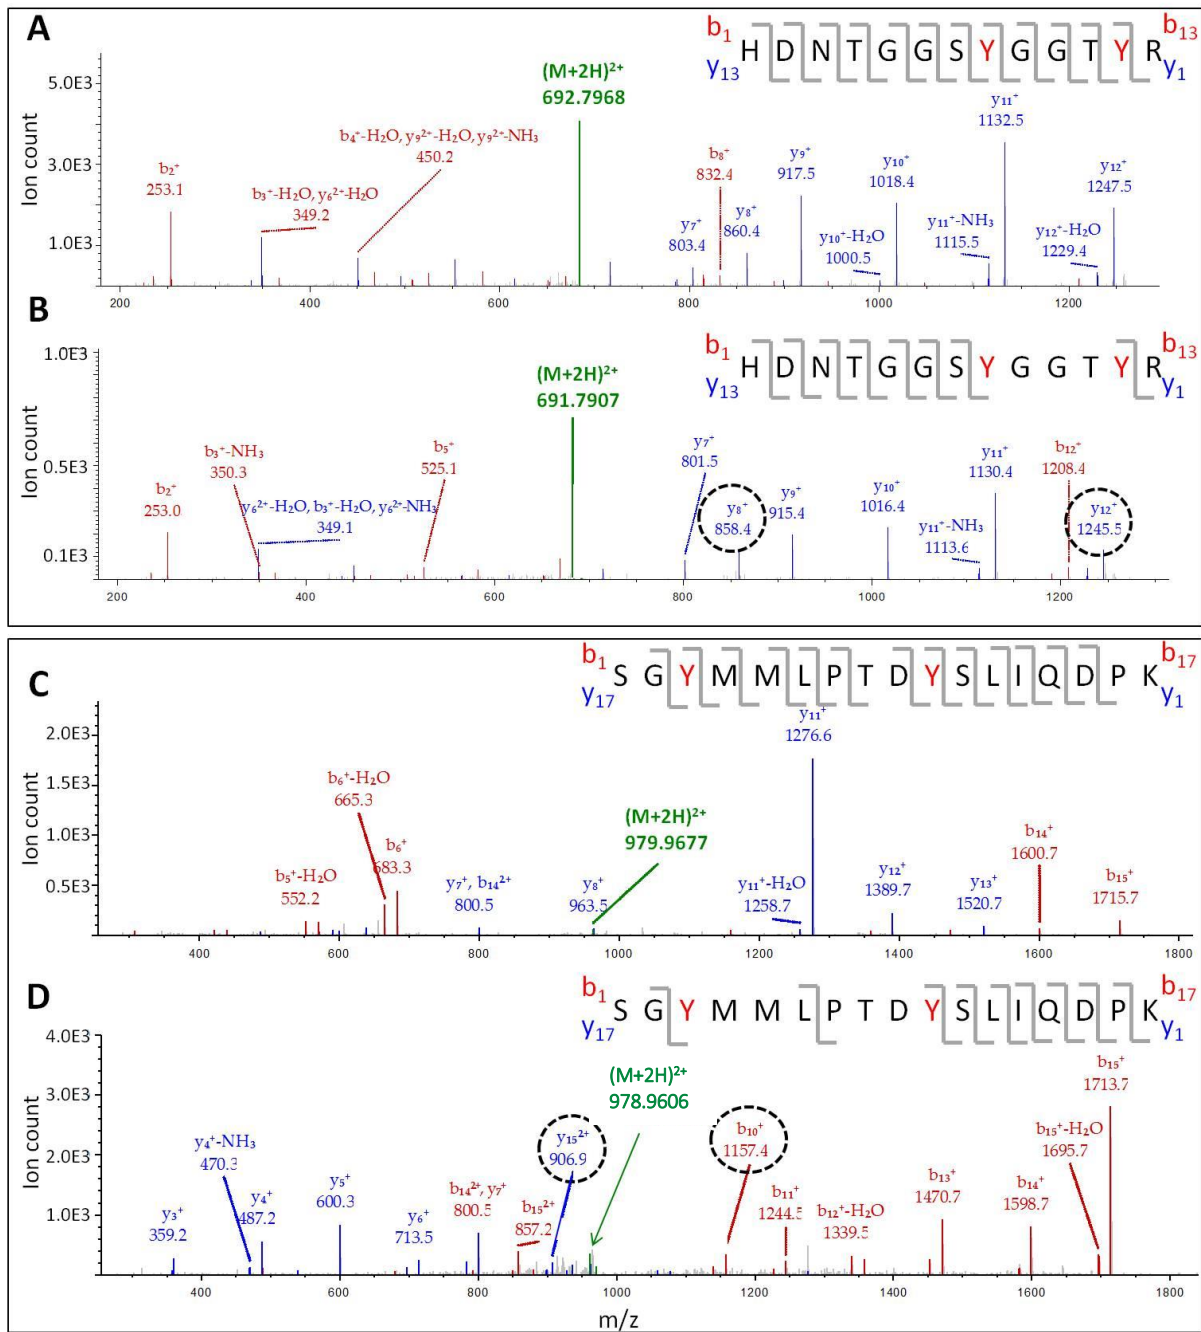

**Fig. S3. LC-MS/MS analysis of dityrosine formation in tryptic peptides T8 and T26**

MS2 spectrum of the  $(M+2H)^{2+}$  ion of: **(A)** native T8 at  $m/z$  692.7968; **(B)** oxidized T8 at  $m/z$  691.7907; **(C)** native T26 at  $m/z$  979.9677; and **(D)** oxidized T26 at  $m/z$  978.9606. The T8 and T26 precursor ions (green) were fragmented by CID (30 V) to give  $b_n$  (red) and  $y_n$  (blue) sequence ions. The encircled  $y_8^+/y_{12}^+$  ions in panel B and  $b_{10}^+/y_{15}^{2+}$  ions in panel D have masses consistent with loss of an H atom (-1 u) from Y67/Y71 and Y229/Y236, respectively. For panels C and D, we selected peaks that do not contain T26 oxidized at M230 or M231 for clarity. The peptide sequence in each panel shows the tyrosines in red font and the observed fragmentations are mapped onto the sequence. Note the absence of fragmentation between crosslinked Y67 and Y71 (panel B), and the single fragmentation within the large 8-residue loop formed by the Y229-Y236 crosslink (panel D).

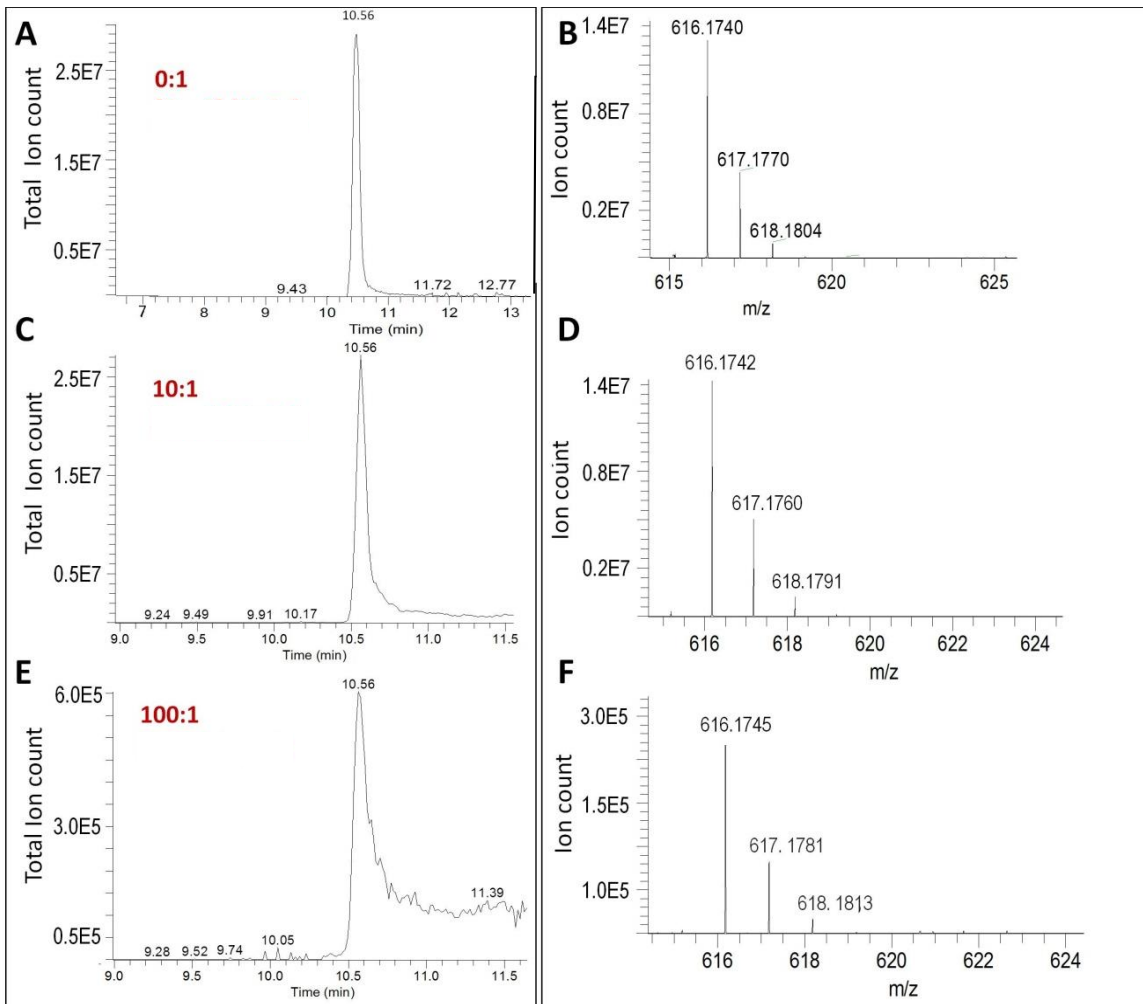

**Fig. S4: LC-MS analysis of hemin released from Ccp1 exposed to 0, 10 and 100 M eq of H<sub>2</sub>O<sub>2</sub>**

Following oxidation of 1  $\mu$ M Ccp1 by 0, 10 and 100  $\mu$ M H<sub>2</sub>O<sub>2</sub> in KPi/DTPA for 1 h at room temperature, samples were diluted 10-fold into the MS solvent and 5- $\mu$ L aliquots were analyzed by LC-MS (see page 3 of the SI). **(A,C,E)** Chromatograms showing the peak at 10.56  $\pm$  0.02 min containing hemin that dissociated from Ccp1 on the C4 column at pH 4.0. The H<sub>2</sub>O<sub>2</sub>:Ccp1 molar ratio is indicated in **red font** on the figures. **(B,D,F)** The corresponding hemin mass spectrum showing the isotopic distribution expected for the M<sup>+</sup> ion (FeC<sub>34</sub>H<sub>22</sub>N<sub>4</sub>O<sub>4</sub>; calc mass 616.1773 u). The exact mass of hemin released from Ccp1 is 616.1742  $\pm$  0.00025 u compared to 616.1746 u for authentic hemin, which was used as an external standard. Note the  $\sim$ 100-fold lower total ion count (y-axis) in panels E,F vs panels A,B,C,D which reflects the extensive destruction of Ccp1's heme by 100 M eq of H<sub>2</sub>O<sub>2</sub>, whereas negligible loss of heme is seen following oxidation of Ccp1 with 10 M eq of H<sub>2</sub>O<sub>2</sub>.

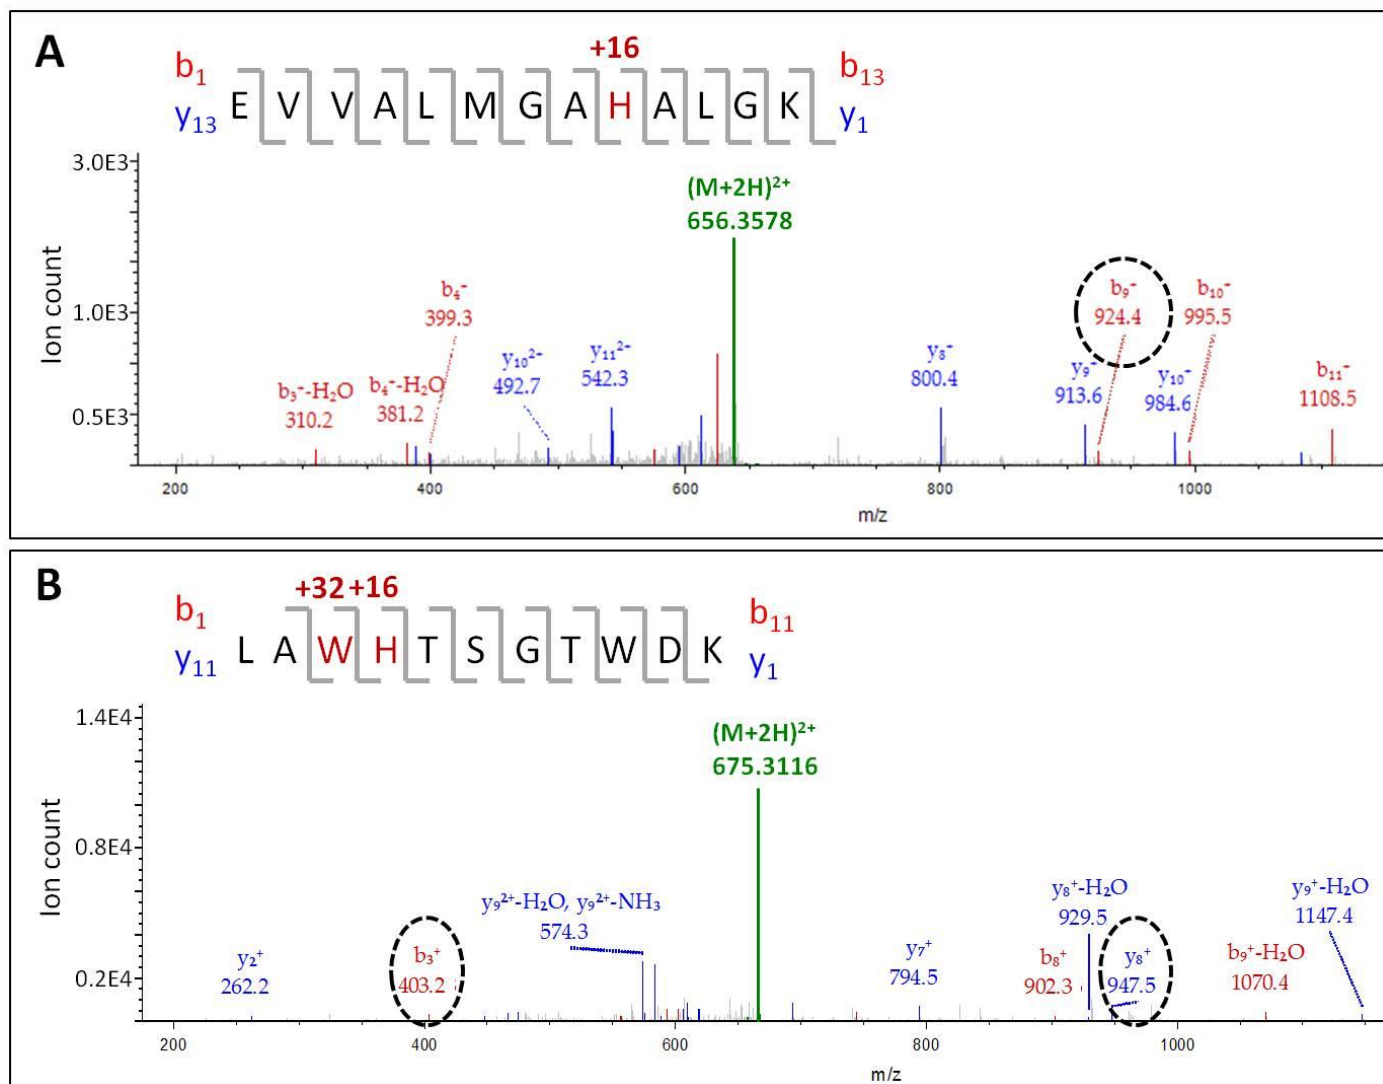

**Fig. S5: LC-MS/MS analysis of H175 and H52 oxidation in tryptic peptides T21 and T7**

The MS2 spectrum of the  $(M+2H)^{2+}$  ion of: **(A)** T21 with oxidized H175 at  $m/z$  656.3578; and **(B)** T7 with oxidized H52 at  $m/z$  675.3116. The T21 and T7 precursor ions (green) were fragmented by CID (30 V) to give  $b_n$  (red) and  $y_n$  sequence ions (blue). The encircled  $b_9^+$  and  $y_8^+$  ions have masses consistent with addition of an oxygen atom (+16 u) to both H175 and H52. Also, the mass of the encircled  $b_3^+$  ion in panel B indicates the addition of two oxygen atoms (+32 u) to W51. The observed fragmentations are mapped onto the sequence. See page 3 of the SI for the experimental details.

## Standard MD simulations of Ccp1 in water with O<sub>2</sub> molecules

The crystal structure of Ccp1 (1ZBY)<sup>6</sup> was chosen as the initial structure for all-atom MD simulations. The positions of the side-chain O and N atoms in Asn and Gln residues, and the protonation states of His, Asp and Glu residues were established by examining the surrounding protein environment. Note that all the oxidizable residues in Fig. S6 are in the neutral form except H60 and H181, which are protonated. Conformer A was selected for residues R48, K123, D152, R166, M172, A193, A194, N195, D210, S246 and K287. Conserved internal crystal water 770 was removed to prevent steric clashing with R48. The remaining 836 crystal waters were embedded with Ccp1 in a box of TIP3P water molecules<sup>7</sup> to provide a water layer of > 8 Å around the protein. Sodium and chloride ions were added to ensure charge neutrality and to set the NaCl concentration to 0.15 M. Ten or 100 O<sub>2</sub> molecules were added into the box outside the protein, and the resulting system was simulated using periodic boundary conditions.

MD simulations were performed with the NAMD 2.7 program<sup>8</sup> using the CHARMM36 all-atom force field<sup>9</sup> at a constant temperature of 310 K and a constant pressure of 1 atm. The van der Waals parameters for the O atom ( $\epsilon = -0.12$  kcal/mol,  $R_{\min}/2 = 1.7\text{Å}$ ) were taken from the CHARMM36 force field,<sup>3</sup> and the published experimental O-O bond length ( $l = 1.207\text{Å}$ ) and its vibrational frequency ( $1580.19\text{ cm}^{-1}$ )<sup>10</sup> were used to calculate the O-O bond force constant ( $k = 1693$  kcal/mol/Å<sup>2</sup>). The particle-mesh Ewald method<sup>11</sup> with a grid size of < 1 Å was selected for long-range electrostatics, while a cut-off of 12 Å was assumed for all other non-bonded interactions. Van der Waals interactions were truncated at a distance of 8 Å using a switching function, and bonds involving hydrogen atoms were constrained using the SHAKE algorithm,<sup>12</sup> permitting the use of a multiple time-step algorithm<sup>13</sup> to compute bonded and short-range non-bonded interactions every 2 fs and long-range electrostatic forces every 6 fs. The temperature and pressure were controlled using Langevin dynamics with the Langevin piston Nose-Hoover method and a damping coefficient  $\gamma$  of 5 ps<sup>-1</sup>.<sup>14,15</sup> The system was heated over 0.4 ns and equilibrated over 1.1 ns, gradually removing the initial restraints on the C <sub>$\alpha$</sub> -backbone atoms and the O atoms of the internal water molecules. Then, a productive run of ~32 ns was performed and only productive runs were analyzed.

In total, 7 independent 32-ns standard trajectories with 10 or 100 O<sub>2</sub> molecules were obtained. The size of the periodic box was ~76x76x76 Å<sup>3</sup> after equilibration, giving O<sub>2</sub> concentrations of ~ 38 and ~380 mM in simulations with 10 and 100 O<sub>2</sub> molecules, respectively, which are > 10<sup>2</sup>-10<sup>3</sup>-fold higher than that of O<sub>2</sub> in water at 293 K and 1 atm (~0.3 mM). These high O<sub>2</sub> concentrations significantly increased sampling of the O<sub>2</sub> docking sites on the surface of Ccp1 and similar results were obtained with 10 or 100 O<sub>2</sub> molecules, but the more intense sampling in simulations with 100 O<sub>2</sub> molecules lead to better convergence. Therefore, the results for simulations with 100 O<sub>2</sub> molecules are shown in Fig. S6, which was produced with the VMD package.<sup>16</sup> Notably, the largest O<sub>2</sub> docking sites are present in hydrophobic grooves on the surface of Ccp1 near H96 and M119, and other surface docking sites are found in hydrophobic patches near Y16, Y42, W101, Y153, Y187, W223, Y236 and Y251. Buried O<sub>2</sub> docking sites, such as the cluster around the distal H52 tend to be smaller than the surface sites due to steric constraints.

From Table S8, we can see that many (15/24) of the residues found to be oxidized in Ccp1 are within 5 Å of an O<sub>2</sub> docking site, which will promote O<sub>2</sub> trapping of radicals formed on these residues. During the simulations, most of the internal waters remained close to their positions in the crystal structure of Ccp1. Strikingly, 26 of the 31 conserved internal waters are located in the distal domain (Fig. S6, Table S8). However, all of Ccp1's oxidizable residues are either solvent exposed or within 5 Å of an internal water molecule. The thermodynamics of one-electron oxidation of most residues require proton transfer at physiological pH (with the rare exception of W191). This is facilitated in Ccp1 by water accessibility to its oxidizable residues,



which underscores the physiological significance of these residues as donors to the heme when Ccp1's reducing substrate, Cyc<sup>II</sup> (Eqs 2,3 of the main text), is unavailable. We note that simulations were performed using the structure of resting, unoxidized Ccp1. Oxidation will most likely alter the structure of the protein and possibly increase water and oxygen accessibility to its buried residues. However, the CD spectra shown in Fig. S7 reveal little change in Ccp1's secondary structure even after its oxidation by 10 M eq of H<sub>2</sub>O<sub>2</sub>.

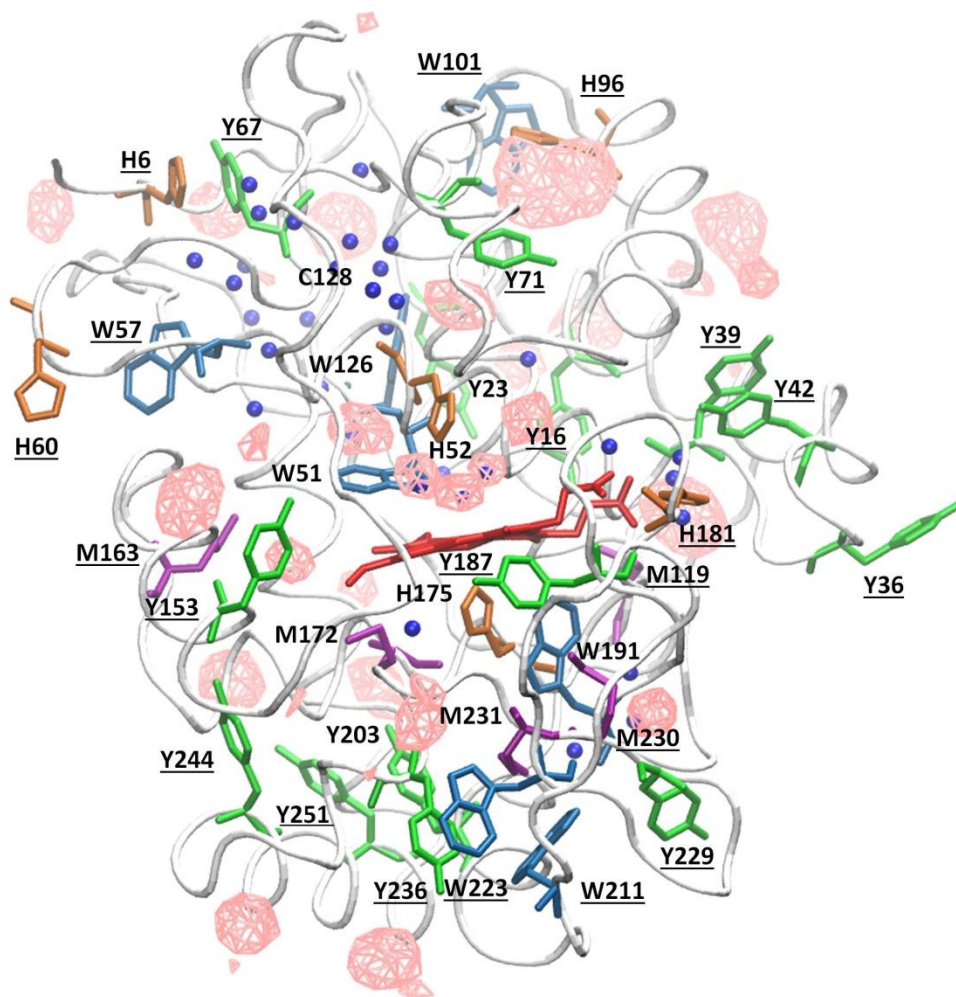

**Fig. S6: MD simulation of Ccp1 in water with 100 added O<sub>2</sub> molecules**

VMD-generated<sup>16</sup> cartoon of Ccp1 (PDB 1ZBY) showing all 33 oxidizable residues (W, blue; Y, green; H, orange; M, purple, C, grey) and those solvent-exposed are underlined. Blue spheres locate the 31 conserved internal water molecules (517, 518, 519, 520, 525, 526, 527, 528, 531, 542, 543, 547, 548, 549, 552, 576, 578, 605, 640, 644, 645, 655, 656, 663, 692, 693, 696, 697, 698, 895, 1232), which were found in 11 PDB structures (1MKQ, 1CCA, 1RYC, 1ZBY, 2XIL, 2XJ5, 2XJ8, 2YCG, 4A6Z, 4A71, 4P4Q), including those of CpdI and CpdII (underlined). Average O<sub>2</sub> densities from 7 standard MD simulations of ~32 ns duration of Ccp1 with 100 O<sub>2</sub> molecules are shown as pink wire surfaces, which represent favorable O<sub>2</sub> docking sites in the polypeptide. The number of such O<sub>2</sub> sites and the number of conserved internal waters found within 5 Å of each oxidizable residue are listed in Table S8.

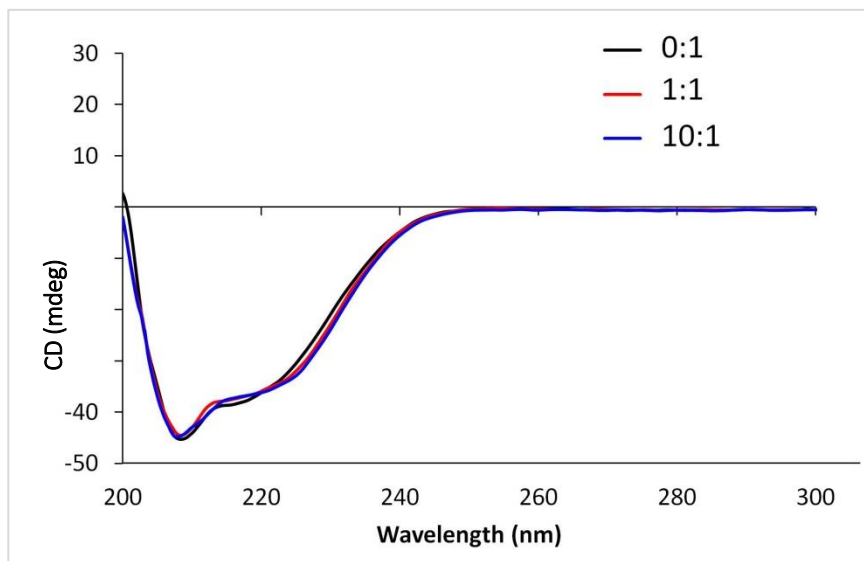

**Fig. S7: Ultraviolet circular dichroism spectrum of Ccp1 oxidized with 0, 1 and 10 M eq of H<sub>2</sub>O<sub>2</sub>**

An aliquot of holoCcp1 was mixed with 0 (black line), 1 (red line) and 10 M eq of H<sub>2</sub>O<sub>2</sub> (blue line) in 20 mM KPi buffer (pH 7.5) in a 0.5-cm pathlength cuvette at room temperature for 1 h before recording the CD spectra. The final concentration of Ccp1 was 2.5  $\mu$ M. The absorbance below 240 nm reveals little change in secondary structure on oxidation of Ccp1 with H<sub>2</sub>O<sub>2</sub>.

**Table S8: O<sub>2</sub> and water exposure of the oxidizable residues in Ccp1<sup>a</sup>**

| Residue | Oxidation level <sup>b,c</sup> | O <sub>2</sub> docking sites < 5 Å <sup>d</sup> | Conserved internal waters < 5 Å <sup>d</sup> | H-bonding to water <sup>e</sup> | Solvent exposed <sup>f</sup> | Zone <sup>g</sup> |
|---------|--------------------------------|-------------------------------------------------|----------------------------------------------|---------------------------------|------------------------------|-------------------|
| M119    | H                              | 1                                               |                                              |                                 | yes                          | 3                 |
| M163    | M                              | 0                                               | W520                                         |                                 | yes                          | 4                 |
| M172    | H                              | 1                                               | W605                                         | yes                             |                              | 3                 |
| M230    | H                              | 0                                               |                                              |                                 | yes                          | 1                 |
| M231    | H                              | 0                                               |                                              | yes                             |                              | 1                 |
| C128    | H                              | 3                                               | W549, W656                                   | yes                             |                              | 2                 |
| H6      | ND                             | 0                                               |                                              |                                 | yes                          | NA                |
| H52     | H                              | 3                                               | W640, W643, W1232                            | yes                             |                              | 3                 |
| H60     | ND                             | 0                                               |                                              |                                 | yes                          | NA                |
| H96     | ND                             | 1                                               |                                              |                                 | yes                          | NA                |
| H175    | H                              | 0                                               | W578, W605                                   | yes                             |                              | 3                 |
| H181    | ND                             | 0                                               |                                              |                                 | yes                          | NA                |
| W51     | H                              | 2                                               | W640, W1232                                  | yes                             |                              | 3                 |
| W57     | H                              | 0                                               | W520                                         | no                              | yes                          | 2a                |
| W101    | L                              | 1                                               |                                              |                                 | yes                          | 2a                |
| W126    | H                              | 2                                               | W543, W547, W655                             | no                              |                              | 2a                |
| W191    | H                              | 0                                               | W578                                         | yes                             |                              | 1                 |
| W211    | H                              | 1                                               |                                              |                                 | yes                          | 1                 |
| W223    | H                              | 1                                               |                                              |                                 | yes                          | 1                 |
| Y16     | M                              | 1                                               |                                              |                                 | yes                          | 2a                |
| Y23     | ND                             | 0                                               | W543                                         | no                              |                              | NA                |
| Y36     | H (-1)                         | 0                                               | W517, W692                                   | yes                             | yes                          | 2b                |
| Y39     | H (-1)                         | 0                                               |                                              |                                 | yes                          | 2b                |
| Y42     | H (-1)                         | 1                                               | W517                                         | no                              | yes                          | 2b                |
| Y67     | H (-1)                         | 1                                               | W552, W697, W698                             | yes                             | yes                          | 2a                |
| Y71     | H (-1)                         | 1                                               | W645                                         | yes                             | yes                          | 2a                |
| Y153    | ND                             | 1                                               |                                              |                                 | yes                          | 4                 |
| Y187    | ND                             | 1                                               |                                              |                                 | yes                          | NA                |
| Y203    | ND                             | 0                                               | W576                                         | no                              |                              | 4                 |
| Y229    | H / L (-1)                     | 0                                               |                                              |                                 | yes                          | 1                 |
| Y236    | L (-1)                         | 1                                               |                                              |                                 | yes                          | 1                 |
| Y244    | ND                             | 0                                               |                                              |                                 | partially                    | 4                 |
| Y251    | L                              | 1                                               |                                              |                                 | partially                    | 4                 |

<sup>a</sup> The 33 oxidizable residues in Ccp1 (see Fig. 1 of the main text and Fig. S6)

<sup>b</sup> The oxidation level of a given residue is classified as high (H: 40-100%), medium (M: 20-40%), low (L: 5-20%) or not detectable (ND) based on the oxidation yields calculated using Eq. 6 of the main text.

<sup>c</sup> Oxidized residues incorporated 1-3 oxygen atoms or lost a hydrogen atom (Table S3) where indicated (-1).

<sup>d</sup> Number of O<sub>2</sub> docking sites and conserved internal waters within 5 Å of the side chain of the indicated residue (Fig. S6).

<sup>e</sup> H-bonding is assumed if the oxygen atom of an internal water and a residue heteroatom are within 3 Å.

<sup>f</sup> Solvent exposure is based on accessibility of bulk water.

<sup>g</sup> See donor zones in Fig. 8 of the main text.

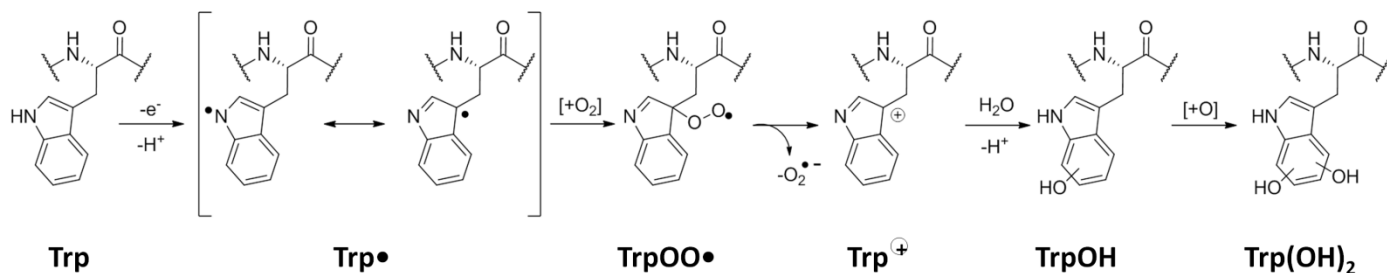

### Scheme S1: Proposed pathway of tryptophan oxidation

One-electron oxidation of tryptophan (Trp) yields the tryptophanyl radical (Trp•, **W•**), which reacts with dioxygen to give the tryptophan peroxy radical (TrpOO•).<sup>17</sup> Superoxide release and water capture by the aryl carbocation leads to TrpOH, which can be further oxidized to Trp(OH)<sub>2</sub>.<sup>18</sup>

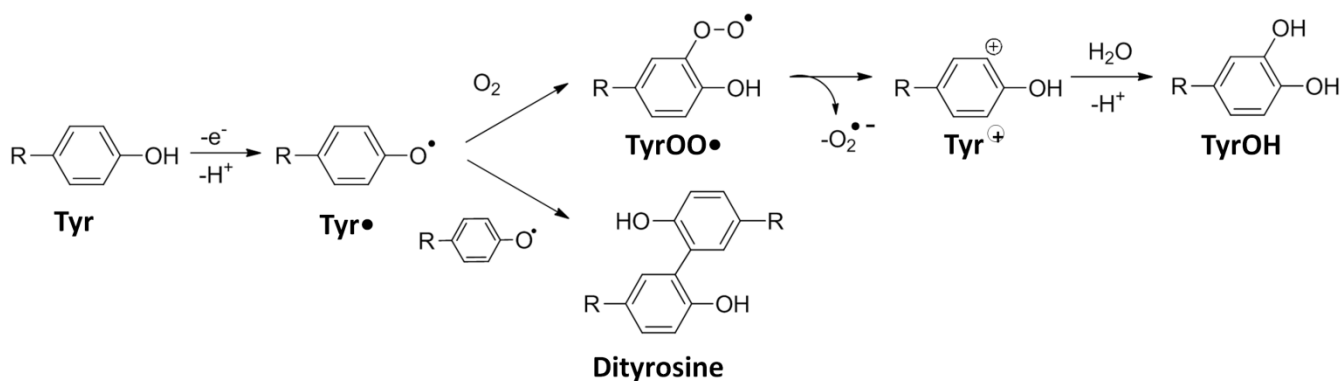

### Scheme S2: Proposed pathway of tyrosine oxidation

One-electron oxidation of tyrosine (Tyr) yields a tyrosyl radical (Tyr•, **Y•**), which reacts rapidly with a second Tyr• to form dityrosine.<sup>19</sup> In the absence of a second Tyr•, the radical reacts slowly with dioxygen to form the tyrosine peroxy radical (TyrOO•).<sup>20</sup> Superoxide release and water capture by the aryl carbocation leads to TyrOH.

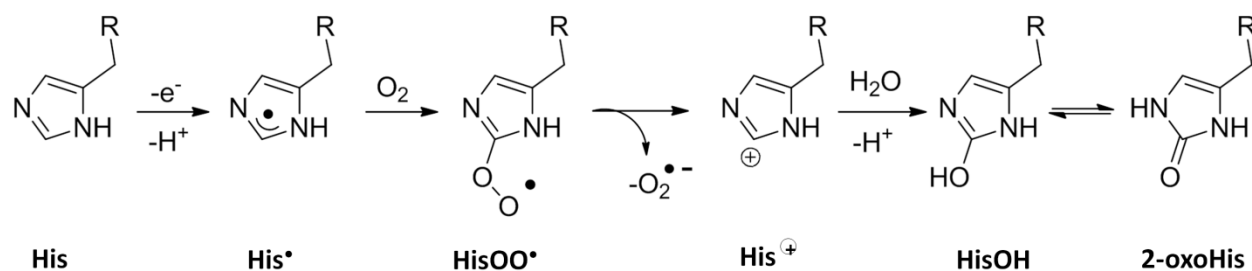

### Scheme S3: Proposed pathway of histidine oxidation

One-electron oxidation of histidine (His) yields a histidine radical (His<sup>•</sup>, H<sup>•</sup>), which reacts with dioxygen to give the histidine peroxy radical (HisOO<sup>•</sup>).<sup>21</sup> Superoxide release and water capture by the aryl carbocation leads to HisOH. The C-2 adduct of the imidazole ring is the energetically most stable species, forming 2-oxoHis.<sup>22</sup>

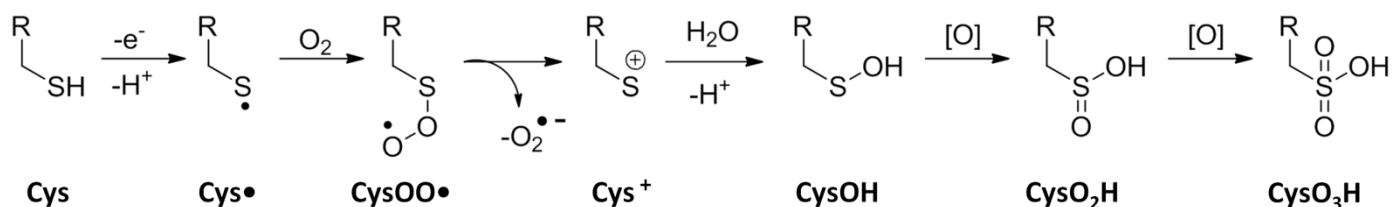

### Scheme S4: Proposed pathway of cysteine oxidation

One-electron oxidation of cysteine (Cys) yields a sulfur radical cation<sup>23</sup> that deprotonates to give the cysteinyl radical (Cys<sup>•</sup>, C<sup>•</sup>). This reacts rapidly with dioxygen ( $6.1 \times 10^7 \text{ M}^{-1}\text{s}^{-1}$ )<sup>24</sup> to give the cysteine peroxy radical (CysSOO<sup>•</sup>).<sup>25,26</sup> Superoxide release and water capture will give CysOH, which can be further oxidized to CysO<sub>2</sub>H and CysO<sub>3</sub>H.

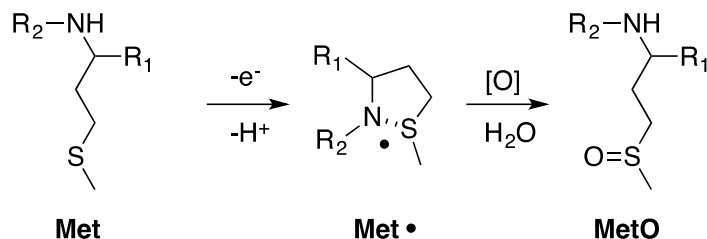

### Scheme S5: Proposed pathway of methionine oxidation

One-electron oxidation of methionine (Met) yields a sulfur radical, which may be stabilized by ring formation between the sulfur and the amino group.<sup>27,28</sup> The subsequent one-electron oxidation of Met<sup>•</sup> by dioxygen will generate methionine sulfoxide (MetO) on water capture.<sup>27,28</sup> As proposed for heme-mediated methionine oxidation in MauG, a protein-based transient Met<sup>•</sup> may be stabilized by ring formation involving a two-center, three-electron (2c3e) bond between the sulfur and a neighboring amide nitrogen or oxygen or an aromatic group.<sup>29</sup>

### Supplemental literature cited

- 1 E. R. Stadtman, *Annu Rev Biochem*, 1993, **62**, 797–821.
- 2 I. M. Møller, A. Rogowska-Wrzęsinska and R. S. P. Rao, *J Proteomics*, 2011, **74**, 2228–2242.
- 3 S. D. Sherrod, M. V Myers, M. Li, J. S. Myers, K. L. Carpenter, B. Maclean, M. J. Maccoss, D. C. Liebler and A. L. Ham, *J Proteome Res*, 2012.
- 4 M. Kathiresan, D. Martins and A. M. English, *Proc Natl Acad Sci U S A*, 2014, **111**, 17468–17473.
- 5 T. Yonetani, *J Biol Chem*, 1965, **240**, 4509–4514.
- 6 C. A. Bonagura, B. Bhaskar, H. Shimizu, H. Li, M. Sundaramoorthy, D. E. McRee, D. B. Goodin and T. L. Poulos, *Biochemistry*, 2003, **42**, 5600–5608.
- 7 W. L. Jorgensen, J. Chandrasekhar, J. D. Madura, R. W. Impey and M. L. Klein, *J Chem Phys*, 1983, **79**, 926–935.
- 8 J. C. Phillips, R. Braun, W. Wang, J. Gumbart, E. Tajkhorshid, E. Villa, C. Chipot, R. D. Skeel and L. Kalé, *J Comput Chem*, 2008, **26**, 1781–1802.
- 9 D. MacKerell, A. D., Jr. Bashford, M. Bellott, J. D. Dunbrack, R. L. Jr. Evanseck, M. J. Field, S. Fischer, J. Gao, H. Guo, S. Ha, D. Joseph-McCarthy, L. Kuchnir, K. Kuczera, F. T. K. Lau, C. Mattos, S. Michnick, T. Ngo, D. T. Nguyen, B. Prodhom, W. E. Reiher, III., B. Roux, M. Schlenkrich, J. C. Smith, R. Stote, J. Straub, M. Watanabe, J. Wiorkiewicz-Kuczera, D. Yin and M. Karplus, *J Phys Chem B*, 1998, **102**, 3586–3616.
- 10 K. Huber and G. Herzberg, *Molecular spectra and molecular structure*, Van Nostrand Reinhold Company, New York, 1979.
- 11 U. Essmann, L. Perera, M. L. Berkowitz, T. Darden, H. Lee and L. G. Pedersen, *J Chem Phys*, 1995, **103**, 31–34.
- 12 J.-P. Ryckaert, G. Ciccotti and H. J. C. Berendsen, *J Comput Phys*, 1977, **23**, 337–341.
- 13 H. Grubmüller, H. Heller, A. Windemuth and K. Schulten, *Mol simulations*, 1991, **6**, 121–142.
- 14 G. J. Martyna, D. J. Tobias and M. L. Klein, *J Chem Phys*, 1994, **101**, 4177–4189.
- 15 S. E. Feller, Y. H. Zhang, R. W. Pastor and B. R. Brooks, *J Chem Phys*, 1995, **103**, 4613–4621.
- 16 W. Humphrey, A. Dalke and K. Schulten, *J Mol Graph*, 1996, **14**, 33–38.
- 17 D. A. Svistunenko, *Biochim Biophys Acta*, 2005, **1707**, 127–155.
- 18 L. Josimović, I. Janković and S. V. Jovanović, *Radiat Phys Chem*, 1993, **41**, 835–841.
- 19 G. Boguta and z A. Dancewic, *Int J Radiat Biol Relat Stud Phys Chem Med*, 1981, **39**, 163–174.

- 20 E. P. L. Hunter, M. F. Desrosiers and M. G. Simic, *Free Radic Biol Med*, 1989, **6**, 581–585.
- 21 M. R. Gunther, J. Andrew Peters and M. K. Sivaneri, *J Biol Chem*, 2002, **277**, 9160–9166.
- 22 A. Samuni and P. Neta, *J Phys Chem*, 1973, **77**, 1–7.
- 23 S. Carballal, B. Alvarez, L. Turell, H. Botti, B. A. Freeman and R. Radi, *Amino Acids*, 2007, **32**, 543–551.
- 24 J. Mönig, K. D. Asmus, L. G. Forni and R. L. Willson, *Int J Radiat Biol Relat Stud Phys Chem Med*, 1987, **52**, 589–602.
- 25 M. D. Sevilla, D. Becker and M. Yan, *J Radiat Biol*, 1990, **57**, 65–81.
- 26 M. D. Sevilla, M. Yan and D. Becker, *Biochem Biophys Res Commun*, 1988, **155**, 405–410.
- 27 C. Schöneich, *Biochim Biophys Acta*, 2005, **1703**, 111–119.
- 28 C. Schöneich, *Arch Biochem Biophys*, 2002, **397**, 370–376.
- 29 Z. Ma, H. R. Williamson and V. L. Davidson, *Biochem J*, 2016, **473**, 1769–1775.
